# Supplementary material for: Long-term sex differences in symptoms and immune profile in Long COVID
Source: Research Square preprint supplement (doi:10.21203/rs.3.rs-7642874/v1), 2025-10-12
Supplement: Supplementary file 1 [file 85346b114dc0685e29b331c1.docx]

**Table S1:** Demographic and clinical data of persistent Long COVID patients disaggregated by sex.

|  | **Women (n = 24)** | **Men (n = 10)** |
| --- | --- | --- |
| **Age categories n (%)** |  |  |
| <30 | 0 | 0 |
| 30-50 | 10 (41.7%) | 2 (20%) |
| 51-60 | 9 (37.5%) | 6 (60%) |
| 61-70 | 3 (12.5%) | 0 |
| >70 | 2 (8.3%) | 2 (20%) |
| **Ethnicity n (%)** |  |  |
| Black | 4 (16.7%) | 3 (30%) |
| White | 20 (83.3%) | 7 (70%) |
| **Comorbidities n (%)** |  |  |
| Digestive System | 2 (8.3%) | 0 |
| Neurological System | 2 (8.3%) | 0 |
| Circulatory System | 7 (29.2%) | 2 (20%) |
| Respiratory System | 4 (16.7%) | 2 (20%) |
| Musculoskeletal System | 1 (4.2%) | 0 |
| Urinary tract | 1 (4.2%) | 0 |
| Genital tract | 1 (4.2%) | 0 |
| Endocrine, Metabolic and Nutritional | 18 (75%) | 7 (70%) |
| Psychological | 11 (45.8%) | 5 (50%) |
| Blood, Hematopoietic, Lymphatic and Spleen | 1 (4.2%) | 0 |
| None | 3 (12.5%) | 1 (10%) |
| **Vaccination Status and Doses n (%)** |  |  |
| Doses |  |  |
| 0 | 1 (4.2%) | 1 (10%) |
| 1 | 2 (8.3%) | 0 |
| 2 | 7 (29.2%) | 3 (30%) |
| 3 | 7 (29.2%) | 2 (20%) |
| 4 | 4 (16.6%) | 3 (30%) |
| 5 | 1 (4.2%) | 1 (10%) |
| 6 | 2 (8.3%) | 0 |
| Vaccine |  |  |
| Corminaty | 14 (58.3%) | 3 (30%) |
| Janssen | 3 (12.5%) | 3 (30%) |
| Spikevax | 4 (16.6%) | 1 (10%) |
| Vaxzevria | 4 (16.6%) | 2 (20%) |
| **Oxygen Support n (%)** |  |  |
| Yes | 1 (4.2%) | 0 |
| No | 23 (95.8%) | 0 |
| **Pneumonia n (%)** |  |  |
| Yes | 1 (4.2%) | 3 (30%) |
| No | 23 (95.8%) | 7 (70%) |
| **COVID-19 hospitalization n (%)** |  |  |
| Yes | 1 (4.2%) | 1 (10%) |
| No | 23 (95.8%) | 9 (90%) |

**Table S2:** Demographic and clinical data of controls disaggregated by sex.

|  | **Women (n = 19)** | **Men (n = 7)** |
| --- | --- | --- |
| **Age categories n (%)** |  |  |
| <30 | 5 (26.3%) | 0 |
| 30-50 | 5 (26.3%) | 1 (14.3%) |
| 51-60 | 4 (21%) | 4 (57.1%) |
| 61-70 | 4 (21%) | 2 (28.6%) |
| >70 | 1 (5.3%) | 0 |
| **Ethnicity n (%)** |  |  |
| White | 19 (100%) | 7 (100%) |
| **Comorbidities n (%)** |  |  |
| Digestive System | 1 (5.3%) | 0 |
| Neurological System | 1 (5.3%) | 0 |
| Circulatory System | 6 (31.6%) | 3 (42.9%) |
| Respiratory System | 0 | 2 (28.6%) |
| Musculoskeletal System | 1 (5.3%) | 0 |
| Urinary tract | 0 | 0 |
| Genital tract | 0 | 2 (28.6%) |
| Endocrine, Metabolic and Nutritional | 8 (42.1%) | 6 (85.7%) |
| Psychological | 3 (15.8%) | 4 (57.1%) |
| Blood, Hematopoietic, Lymphatic and Spleen | 0 | 0 |
| None | 8 (42.1%) | 1 (14.3%) |
| **Vaccination Status and Doses n (%)** |  |  |
| Doses |  |  |
| 0 | 1 (5.3%) | 1 (14.3%) |
| 1 | 2 (10.5%) | 0 |
| 2 | 0 | 0 |
| 3 | 6 (31.6%) | 2 (28.6%) |
| 4 | 8 (42.1%) | 3 (42.9%) |
| 5 | 2 (10.5%) | 1 (14.3%) |
| 6 | 0 | 0 |
| Vaccine |  |  |
| Corminaty | 18 (94.7%) | 5 (71.4%) |
| Janssen | 0 | 0 |
| Spikevax | 0 | 0 |
| Vaxzevria | 0 | 1 (14.3%) |

**Table S3:** Comorbidities divided by health system categories for controls and pLC disaggregated by sex.

| **Health System Category** | **Controls** | | **pLC** | |
| --- | --- | --- | --- | --- |
| **Women**  **(n = 19)** | **Men**  **(n = 7)** | **Women**  **(n = 24)** | **Men**  **(n = 10)** |
| **Digestive System n (%)** |  |  |  |  |
| Ulcerative colitis | 0 | 1 (14%) | 0 | 0 |
| Functional alteration of the stomach | 0 | 0 | 1 (4%) | 0 |
| Heartburn | 0 | 0 | 1 (4%) | 0 |
| Malignant neoplasm of the colon/rectum | 0 | 0 | 1 (4%) | 0 |
| **Neurological System n (%)** |  |  |  |  |
| Congenital neurological malformation | 1 (5%) | 0 | 0 | 0 |
| Migraine | 0 | 0 | 2 (8%) | 0 |
| **Circulatory System n (%)** |  |  |  |  |
| Hypertension | 6 (32%) | 3 (43%) | 7 (29%) | 2 (20%) |
| Cerebrovascular disease | 0 | 1 (14%) | 0 | 0 |
| Ischemia heart disease with angina | 0 | 0 | 1 (4%) | 0 |
| **Respiratory System n (%)** |  |  |  |  |
| Asthma | 0 | 1 (14%) | 2 (8%) | 0 |
| Sinusitis | 0 | 1 (14%) | 1 (4%) | 1 (10%) |
| Chronic obstructive pulmonary disease | 0 | 1 (14%) | 1 (4%) | 0 |
| Respiratory Disease | 0 | 0 | 0 | 1 (10%) |
| **Musculoskeletal System n (%)** |  |  |  |  |
| Musculoskeletal system disease | 0 | 1 (14%) | 0 | 0 |
| Rheumatoid Arthritis | 0 | 0 | 1 (4%) | 0 |
| Osteoporosis | 0 | 0 | 1 (4%) | 0 |
| **Urinary tract n (%)** |  |  |  |  |
| Urinary stone | 0 | 0 | 1 (4%) | 0 |
| **Genital tract n (%)** |  |  |  |  |
| Malignant neoplasm of the prostate | 0 | 1 (14%) | 0 | 0 |
| Benign prostatic hypertrophy | 0 | 1 (14%) | 0 | 0 |
| Excessive menstruation | 0 | 0 | 1 (4%) | 0 |
| **Endocrine, Metabolic and Nutritional n (%)** |  |  |  |  |
| Alteration of lipid metabolism | 1 (5%) | 4 (57%) | 10 (42%) | 4 (40%) |
| Overweight | 3 (16%) | 3 (43%) | 5 (21%) | 1 (10%) |
| Obesity | 4 (21%) | 2 (29%) | 8 (33%) | 6 (60%) |
| Type 2 Diabetes | 1 (5%) | 1 (14%) | 2 (8%) | 3 (30%) |
| Hypothyroidism | 0 | 1 (14%) | 3 (13%) | 0 |
| Gout | 0 | 0 | 0 | 1 (10%) |
| **Psychological n (%)** |  |  |  |  |
| Depression | 0 | 2 (29%) | 7 (29%) | 1 (10%) |
| Sleep disturbance | 0 | 1 (14%) | 2 (8%) | 2 (20%) |
| Tobacco abuse | 2 (11%) | 1 (14%) | 4 (17%) | 1 (10%) |
| Affective psychosis | 1 (5%) | 0 | 1 (4%) | 0 |
| Anxiety | 0 | 0 | 1 (4%) | 1 (10%) |
| **Blood, Hematopoietic, Lymphatic and Spleen n (%)** |  |  |  |  |
| Lymphadenitis | 0 | 0 | 1 (4%) | 0 |

**Table S4:** Symptoms of pLCs patients divided by health system categories disaggregated by sex.

| **Health System category** | **Women**  **(n = 21)** | **Men**  **(n = 9)** |
| --- | --- | --- |
| **Neurocognitive n (%)** |  |  |
| Concentration problems | 17 (81%) | 5 (56%) |
| Anxiety | 15 (71%) | 4 (44%) |
| Oblivion | 15 (71%) | 6 (67%) |
| Insomnia | 14 (67%) | 7 (78%) |
| Loss of interest | 14 (67%) | 1 (11%) |
| Changing behavior | 13 (62%) | 1 (11%) |
| Decreased/slowed movement | 11 (52%) | 0 |
| Depressive mood | 11 (52%) | 1 (11%) |
| Fainting | 2 (10%) | 0 |
| Hallucinations | 2 (10%) | 0 |
| **Neurosensory n (%)** |  |  |
| Dizziness | 13 (62%) | 7 (78%) |
| Balance changes | 12 (57%) | 2 (22%) |
| Numbness | 10 (48%) | 4 (44%) |
| Persistent headache | 10 (48%) | 2 (22%) |
| Decrease/absence/change in taste | 10 (48%) | 1 (11%) |
| Decrease/absence/change in smell | 10 (48%) | 1 (11%) |
| Vision changes | 8 (38%) | 4 (44%) |
| Tinnitus | 6 (29%) | 1 (11%) |
| Limb spasms | 5 (24%) | 1 (11%) |
| Hearing changes | 5 (24%) | 0 |
| Tremor | 3 (14%) | 1 (11%) |
| **Respiratory System/ Cardiothoracic n (%)** |  |  |
| Chest pain | 7 (33%) | 3 (33%) |
| Dyspnea | 7 (33%) | 2 (22%) |
| Pain when breathing | 6 (29%) | 1 (11%) |
| Persistent dry cough | 3 (14%) | 3 (33%) |
| **Digestive System n (%)** |  |  |
| Stomach pain | 9 (43%) | 2 (22%) |
| Nausea/vomit | 5 (24%) | 2 (22%) |
| Constipation | 4 (19%) | 4 (44%) |
| Change in swallowing | 4 (19%) | 1 (11%) |
| Diarrhea | 3 (14%) | 2 (22%) |
| **Musculoskeletal System/ Fatigue n (%)** |  |  |
| Persistent fatigue | 18 (86%) | 4 (44%) |
| Drowsiness | 16 (76%) | 6 (67%) |
| Persistent muscle pain | 11 (52%) | 4 (44%) |
| Weakness in legs/arms | 9 (43%) | 3 (33%) |
| Malaise after exercise | 7 (33%) | 2 (22%) |
| Muscle stiffness | 6 (29%) | 1 (11%) |
| Inability to move | 3 (14%) | 0 |
| **Dermatological/ Sexual/ Others n (%)** |  |  |
| Palpitation | 7 (33%) | 2 (22%) |
| Weight loss | 6 (29%) | 0 |
| Sexual dysfunction | 5 (24%) | 1 (11%) |
| Changing gait/falls | 4 (19%) | 1 (11%) |
| Fever | 4 (19%) | 1 (11%) |
| Toe injuries | 3 (14%) | 0 |
| Skin rash | 2 (10%) | 0 |
| Difficulty urinating | 1 (5%) | 1 (11%) |
| Peripheral edema | 1 (5%) | 1 (11%) |
